# Supplementary material for: Improving the quantification of peak concentrations for air quality sensors via data weighting
Source: Copernicus journal article supplement (doi:10.5194/egusphere-2024-4080), 2025-01-22
Supplement: Supplementary file 1 [file egusphere-2024-4080-supplement.pdf]

Table S1. Sensor information

| Sensor           | Target Pollutant | Manufacturer | Approximate Cost (USD 2024) |
|------------------|------------------|--------------|-----------------------------|
| Alphasense CO-B4 | CO               | Alphasense   | 80                          |
| Figaro 2600      | tVOC             | Figaro       | 15                          |
| Figaro 2602      | tVOC             | Figaro       | 15                          |
| Figaro 2611      | CH4              | Figaro       | 15                          |
| MQ4              | CH4              | Hanwei       | 5                           |

Table S2. Summary statistics for CO calibration models, where RF is random forest and MLR is multiple linear regression. Piece indicates a piecewise weighting function with a percentile cut off listed subsequently.

| Model                   | Training R2 | Testing R2 | R2   | Training RMSE | Testing RMSE | RMSE  | Training MBE | Testing MBE | MBE   |
|-------------------------|-------------|------------|------|---------------|--------------|-------|--------------|-------------|-------|
| <b>RF unweighted</b>    | 0.82        | 0.78       | 0.81 | 0.075         | 0.092        | 0.080 | 0.000        | 0.012       | 0.004 |
| <b>RF Sigmoid</b>       | 0.79        | 0.73       | 0.77 | 0.082         | 0.102        | 0.088 | 0.031        | 0.043       | 0.035 |
| <b>RF Sigmoid z=0.5</b> | 0.76        | 0.71       | 0.74 | 0.086         | 0.106        | 0.093 | 0.040        | 0.052       | 0.044 |
| <b>RF Sigmoid z=1</b>   | 0.73        | 0.68       | 0.70 | 0.092         | 0.111        | 0.099 | 0.050        | 0.061       | 0.054 |
| <b>RF Sigmoid z=1.5</b> | 0.68        | 0.63       | 0.65 | 0.101         | 0.119        | 0.107 | 0.063        | 0.074       | 0.067 |
| <b>RF Sigmoid z=2</b>   | 0.63        | 0.59       | 0.60 | 0.108         | 0.125        | 0.114 | 0.073        | 0.083       | 0.077 |
| <b>RF Sigmoid z=2.5</b> | 0.57        | 0.53       | 0.54 | 0.117         | 0.134        | 0.123 | 0.085        | 0.095       | 0.088 |
| <b>RF Sigmoid z=3</b>   | 0.43        | 0.38       | 0.40 | 0.135         | 0.154        | 0.141 | 0.105        | 0.119       | 0.109 |
| <b>RF piece 75</b>      | 0.76        | 0.72       | 0.74 | 0.087         | 0.104        | 0.093 | 0.036        | 0.045       | 0.040 |
| <b>RF piece 80</b>      | 0.77        | 0.72       | 0.75 | 0.084         | 0.103        | 0.090 | 0.031        | 0.040       | 0.035 |

|                          |      |      |      |       |       |       |       |       |       |
|--------------------------|------|------|------|-------|-------|-------|-------|-------|-------|
| <b>RF piece 85</b>       | 0.78 | 0.72 | 0.76 | 0.084 | 0.103 | 0.090 | 0.029 | 0.038 | 0.033 |
| <b>RF piece 90</b>       | 0.79 | 0.74 | 0.77 | 0.081 | 0.100 | 0.087 | 0.024 | 0.034 | 0.027 |
| <b>RF piece 95</b>       | 0.80 | 0.76 | 0.79 | 0.079 | 0.096 | 0.083 | 0.015 | 0.027 | 0.018 |
| <b>RF piece 99</b>       | 0.82 | 0.78 | 0.81 | 0.076 | 0.092 | 0.080 | 0.004 | 0.017 | 0.007 |
| <b>RF piece 99.5</b>     | 0.82 | 0.78 | 0.81 | 0.075 | 0.091 | 0.080 | 0.003 | 0.016 | 0.007 |
| <b>RF piece 99.9</b>     | 0.82 | 0.79 | 0.81 | 0.075 | 0.090 | 0.079 | 0.001 | 0.014 | 0.005 |
| <b>MLR unweighted</b>    | 0.74 | 0.77 | 0.75 | 0.090 | 0.095 | 0.091 | 0.000 | 0.000 | 0.003 |
| <b>MLR Sigmoid</b>       | 0.71 | 0.74 | 0.71 | 0.096 | 0.101 | 0.098 | 0.032 | 0.033 | 0.035 |
| <b>MLR Sigmoid z=.5</b>  | 0.68 | 0.72 | 0.68 | 0.100 | 0.104 | 0.102 | 0.043 | 0.043 | 0.046 |
| <b>MLR Sigmoid z=1</b>   | 0.64 | 0.68 | 0.64 | 0.107 | 0.111 | 0.109 | 0.055 | 0.056 | 0.058 |
| <b>MLR Sigmoid z=1.5</b> | 0.57 | 0.63 | 0.58 | 0.116 | 0.119 | 0.118 | 0.070 | 0.071 | 0.073 |
| <b>MLR Sigmoid z=2</b>   | 0.47 | 0.54 | 0.48 | 0.129 | 0.132 | 0.131 | 0.088 | 0.090 | 0.091 |
| <b>MLR Sigmoid z=2.5</b> | 0.31 | 0.41 | 0.32 | 0.147 | 0.151 | 0.149 | 0.110 | 0.114 | 0.113 |
| <b>MLR Sigmoid z=3</b>   | 0.07 | 0.20 | 0.08 | 0.172 | 0.176 | 0.174 | 0.138 | 0.143 | 0.141 |
| <b>MLR piece 75</b>      | 0.68 | 0.71 | 0.68 | 0.101 | 0.105 | 0.103 | 0.045 | 0.046 | 0.048 |
| <b>MLR piece 80</b>      | 0.68 | 0.71 | 0.68 | 0.100 | 0.105 | 0.103 | 0.044 | 0.045 | 0.047 |
| <b>MLR piece 85</b>      | 0.68 | 0.71 | 0.68 | 0.100 | 0.105 | 0.102 | 0.043 | 0.043 | 0.046 |
| <b>MLR piece 90</b>      | 0.69 | 0.71 | 0.69 | 0.099 | 0.105 | 0.101 | 0.037 | 0.036 | 0.040 |
| <b>MLR piece 95</b>      | 0.70 | 0.71 | 0.70 | 0.097 | 0.105 | 0.099 | 0.026 | 0.025 | 0.029 |
| <b>MLR piece 99</b>      | 0.72 | 0.74 | 0.73 | 0.094 | 0.101 | 0.094 | 0.011 | 0.009 | 0.014 |

|                           |      |      |      |       |       |       |       |       |       |
|---------------------------|------|------|------|-------|-------|-------|-------|-------|-------|
| <b>MLR piece<br/>99.5</b> | 0.73 | 0.74 | 0.74 | 0.092 | 0.099 | 0.093 | 0.008 | 0.006 | 0.011 |
| <b>MLR piece<br/>99.9</b> | 0.74 | 0.76 | 0.75 | 0.090 | 0.096 | 0.091 | 0.003 | 0.003 | 0.006 |

Table S3. Summary statistics for CH<sub>4</sub> calibration models, where RF is random forest and MLR is multiple linear regression. Piece indicates a piecewise weighting function with a percentile cut off listed subsequently.

| <b>Model</b>                | Training<br>R2 | Testing<br>R2 | R2   | Training<br>RMSE | Testing<br>RMSE | RMSE  | Training<br>MBE | Testing<br>MBE | MBE        |
|-----------------------------|----------------|---------------|------|------------------|-----------------|-------|-----------------|----------------|------------|
| <b>RF unweighted</b>        | 0.83           | 0.67          | 0.79 | 0.149            | 0.221           | 0.169 | 0.000           | -0.060         | -<br>0.006 |
| <b>RF Sigmoid</b>           | 0.86           | 0.72          | 0.8  | 0.137            | 0.203           | 0.163 | 0.025           | -0.034         | 0.021      |
| <b>RF Sigmoid<br/>z=0.5</b> | 0.85           | 0.73          | 0.79 | 0.141            | 0.201           | 0.166 | 0.036           | -0.023         | 0.032      |
| <b>RF Sigmoid<br/>z=1</b>   | 0.83           | 0.74          | 0.78 | 0.148            | 0.197           | 0.172 | 0.047           | -0.010         | 0.045      |
| <b>RF Sigmoid<br/>z=1.5</b> | 0.8            | 0.73          | 0.75 | 0.160            | 0.200           | 0.182 | 0.063           | 0.006          | 0.061      |
| <b>RF Sigmoid<br/>z=2</b>   | 0.77           | 0.72          | 0.72 | 0.174            | 0.205           | 0.195 | 0.080           | 0.019          | 0.077      |
| <b>RF Sigmoid<br/>z=2.5</b> | 0.7            | 0.69          | 0.65 | 0.196            | 0.214           | 0.215 | 0.101           | 0.041          | 0.100      |
| <b>RF Sigmoid<br/>z=3</b>   | 0.59           | 0.63          | 0.54 | 0.232            | 0.235           | 0.247 | 0.134           | 0.076          | 0.134      |
| <b>RF piece 75</b>          | 0.84           | 0.72          | 0.79 | 0.144            | 0.206           | 0.167 | 0.027           | -0.026         | 0.023      |
| <b>RF piece 80</b>          | 0.83           | 0.72          | 0.78 | 0.147            | 0.206           | 0.170 | 0.031           | -0.023         | 0.028      |
| <b>RF piece 85</b>          | 0.83           | 0.72          | 0.78 | 0.149            | 0.204           | 0.172 | 0.035           | -0.020         | 0.031      |
| <b>RF piece 90</b>          | 0.82           | 0.73          | 0.77 | 0.151            | 0.202           | 0.174 | 0.038           | -0.021         | 0.034      |
| <b>RF piece 95</b>          | 0.82           | 0.74          | 0.77 | 0.154            | 0.198           | 0.176 | 0.039           | -0.024         | 0.036      |

|                          |       |       |      |       |       |       |       |        |        |
|--------------------------|-------|-------|------|-------|-------|-------|-------|--------|--------|
| <b>RF piece 99</b>       | 0.86  | 0.71  | 0.8  | 0.137 | 0.207 | 0.165 | 0.021 | -0.040 | 0.016  |
| <b>RF piece 99.5</b>     | 0.86  | 0.72  | 0.81 | 0.134 | 0.205 | 0.161 | 0.014 | -0.042 | 0.009  |
| <b>RF piece 99.9</b>     | 0.86  | 0.7   | 0.81 | 0.133 | 0.213 | 0.161 | 0.007 | -0.052 | 0.002  |
| <b>MLR unweighted</b>    | 0.75  | 0.69  | 0.73 | 0.182 | 0.215 | 0.190 | 0.000 | -0.048 | -      |
| <b>MLR Sigmoid</b>       | 0.71  | 0.65  | 0.7  | 0.196 | 0.230 | 0.200 | 0.031 | -0.058 | 0.024  |
| <b>MLR Sigmoid z=.5</b>  | 0.66  | 0.56  | 0.66 | 0.210 | 0.256 | 0.214 | 0.042 | -0.073 | 0.036  |
| <b>MLR Sigmoid z=1</b>   | 0.56  | 0.35  | 0.56 | 0.238 | 0.311 | 0.243 | 0.056 | -0.100 | 0.050  |
| <b>MLR Sigmoid z=1.5</b> | 0.36  | -0.12 | 0.35 | 0.287 | 0.408 | 0.295 | 0.073 | -0.141 | 0.067  |
| <b>MLR Sigmoid z=2</b>   | -0.01 | -1.03 | -    | 0.05  | 0.362 | 0.551 | 0.376 | 0.096  | -0.193 |
| <b>MLR Sigmoid z=2.5</b> | -0.64 | -2.54 | -    | 0.74  | 0.461 | 0.728 | 0.483 | 0.133  | -0.244 |
| <b>MLR Sigmoid z=3</b>   | -1.59 | -4.56 | -1.8 | 0.580 | 0.912 | 0.613 | 0.203 | -0.265 | 0.197  |
| <b>MLR piece 75</b>      | 0.7   | 0.64  | 0.69 | 0.198 | 0.233 | 0.203 | 0.036 | -0.065 | 0.030  |
| <b>MLR piece 80</b>      | 0.69  | 0.63  | 0.68 | 0.201 | 0.236 | 0.206 | 0.045 | -0.059 | 0.038  |
| <b>MLR piece 85</b>      | 0.68  | 0.62  | 0.67 | 0.205 | 0.239 | 0.210 | 0.054 | -0.052 | 0.047  |
| <b>MLR piece 90</b>      | 0.65  | 0.59  | 0.65 | 0.212 | 0.247 | 0.216 | 0.061 | -0.046 | 0.054  |
| <b>MLR piece 95</b>      | 0.62  | 0.56  | 0.63 | 0.221 | 0.256 | 0.224 | 0.065 | -0.038 | 0.058  |
| <b>MLR piece 99</b>      | 0.62  | 0.54  | 0.61 | 0.223 | 0.261 | 0.228 | 0.048 | -0.020 | 0.042  |
| <b>MLR piece 99.5</b>    | 0.63  | 0.54  | 0.62 | 0.218 | 0.262 | 0.226 | 0.037 | -0.016 | 0.031  |
| <b>MLR piece 99.9</b>    | 0.71  | 0.64  | 0.7  | 0.194 | 0.232 | 0.202 | 0.019 | -0.032 | 0.013  |

Table S4. Summary statistics for TVOC calibration models, where RF is random forest and MLR is multiple linear regression. Piece indicates a piecewise weighting function with a percentile cut off listed subsequently.

| <b>Model</b>            | Training R2 | Testing R2 | R2        | Training RMSE | Testing RMSE | RMSE  | Training MBE | Testing MBE | MBE   |
|-------------------------|-------------|------------|-----------|---------------|--------------|-------|--------------|-------------|-------|
| <b>RF unweighted</b>    | 0.72        | 0.64       | 0.69      | 52.13         | 42.57        | 52.60 | -0.09        | -0.35       | 5.75  |
| <b>RF Sigmoid</b>       | 0.69        | 0.64       | 0.63      | 54.17         | 42.95        | 56.85 | 13.18        | 9.73        | 19.54 |
| <b>RF Sigmoid z=0.5</b> | 0.67        | 0.62       | 0.6       | 55.99         | 43.72        | 59.28 | 17.87        | 12.81       | 24.33 |
| <b>RF Sigmoid z=1</b>   | 0.66        | 0.58       | 0.56      | 57.18         | 46.46        | 62.26 | 22.83        | 17.38       | 29.51 |
| <b>RF Sigmoid z=1.5</b> | 0.59        | 0.49       | 0.47      | 62.73         | 50.74        | 68.60 | 29.24        | 21.54       | 36.00 |
| <b>RF Sigmoid z=2</b>   | 0.49        | 0.39       | 0.34      | 69.76         | 55.59        | 76.14 | 36.78        | 27.31       | 43.61 |
| <b>RF Sigmoid z=2.5</b> | 0.31        | 0.22       | 0.12      | 81.72         | 63.16        | 88.31 | 46.27        | 33.35       | 52.96 |
| <b>RF Sigmoid z=3</b>   | 0.09        | 0.02       | -<br>0.12 | 93.72         | 70.71        | 99.56 | 61.68        | 41.36       | 67.33 |
| <b>RF piece 75</b>      | 0.67        | 0.61       | 0.61      | 56.72         | 44.81        | 58.66 | 14.76        | 10.78       | 21.03 |
| <b>RF piece 80</b>      | 0.68        | 0.6        | 0.62      | 55.20         | 45.23        | 58.24 | 15.46        | 11.00       | 21.59 |
| <b>RF piece 85</b>      | 0.64        | 0.59       | 0.58      | 58.71         | 45.56        | 60.88 | 16.83        | 11.18       | 22.51 |
| <b>RF piece 90</b>      | 0.64        | 0.6        | 0.57      | 59.18         | 45.30        | 61.90 | 17.05        | 9.96        | 22.63 |
| <b>RF piece 95</b>      | 0.68        | 0.65       | 0.6       | 55.20         | 42.47        | 59.69 | 14.47        | 6.68        | 20.42 |
| <b>RF piece 99</b>      | 0.72        | 0.66       | 0.63      | 51.58         | 41.79        | 57.41 | 6.86         | 2.48        | 13.40 |
| <b>RF piece 99.5</b>    | 0.74        | 0.65       | 0.65      | 50.09         | 42.26        | 55.42 | 4.56         | 1.53        | 11.19 |
| <b>RF piece 99.9</b>    | 0.74        | 0.63       | 0.68      | 49.56         | 43.32        | 53.53 | 1.77         | 0.38        | 8.18  |

|                          |       |       |           |        |        |        |       |       |       |
|--------------------------|-------|-------|-----------|--------|--------|--------|-------|-------|-------|
| <b>MLR unweighted</b>    | 0.57  | 0.61  | 0.58      | 64.40  | 44.68  | 61.24  | 0.00  | 1.20  | 5.50  |
| <b>MLR Sigmoid</b>       | 0.5   | 0.56  | 0.47      | 69.65  | 47.19  | 68.21  | 11.79 | 16.15 | 17.29 |
| <b>MLR Sigmoid z=.5</b>  | 0.43  | 0.51  | 0.4       | 73.79  | 49.99  | 72.74  | 14.06 | 20.10 | 19.56 |
| <b>MLR Sigmoid z=1</b>   | 0.33  | 0.42  | 0.28      | 80.26  | 54.43  | 79.56  | 15.50 | 23.65 | 21.00 |
| <b>MLR Sigmoid z=1.5</b> | 0.15  | 0.26  | 0.09      | 90.29  | 61.51  | 89.85  | 15.53 | 26.37 | 21.03 |
| <b>MLR Sigmoid z=2</b>   | -0.16 | -0.05 | -<br>0.26 | 105.70 | 72.95  | 105.40 | 13.85 | 28.35 | 19.35 |
| <b>MLR Sigmoid z=2.5</b> | -0.7  | -0.59 | -<br>0.84 | 127.76 | 90.10  | 127.55 | 10.86 | 30.70 | 16.36 |
| <b>MLR Sigmoid z=3</b>   | -1.51 | -1.47 | -<br>1.73 | 155.35 | 112.11 | 155.22 | 8.20  | 35.72 | 13.70 |
| <b>MLR piece 75</b>      | 0.51  | 0.55  | 0.49      | 68.36  | 48.12  | 66.80  | 13.38 | 17.47 | 18.88 |
| <b>MLR piece 80</b>      | 0.49  | 0.52  | 0.47      | 69.73  | 49.25  | 68.44  | 15.00 | 20.10 | 20.49 |
| <b>MLR piece 85</b>      | 0.47  | 0.49  | 0.44      | 71.63  | 50.95  | 70.63  | 16.97 | 23.35 | 22.47 |
| <b>MLR piece 90</b>      | 0.42  | 0.45  | 0.38      | 74.54  | 52.85  | 73.86  | 19.30 | 26.52 | 24.80 |
| <b>MLR piece 95</b>      | 0.35  | 0.45  | 0.3       | 79.24  | 52.76  | 78.89  | 21.69 | 25.48 | 27.19 |
| <b>MLR piece 99</b>      | 0.26  | 0.52  | 0.2       | 84.33  | 49.51  | 84.04  | 18.75 | 15.06 | 24.25 |
| <b>MLR piece 99.5</b>    | 0.31  | 0.56  | 0.26      | 81.47  | 47.35  | 80.94  | 15.21 | 10.13 | 20.71 |
| <b>MLR piece 99.9</b>    | 0.48  | 0.62  | 0.46      | 70.50  | 44.18  | 68.88  | 7.10  | 6.70  | 12.60 |
